# Supplementary material for: A Comprehensive Review of the Effects of Glycemic Carbohydrates on the Neurocognitive Functions Based on Gut Microenvironment Regulation and Glycemic Fluctuation Control
Source: MDPI journal article supplement (doi:10.3390/nu15245080), 2023-12-12
Supplement: s1 [file s1]

**Table S1.** Effects of monosaccharide and disaccharide intake on gut microbiota

| Sugar    | Fermentation                   | Gut microbiota <sup>a)</sup>                                                                                                                                                  |                                                                                                                             | Other metabolites                                                                                                                 | Ref |
|----------|--------------------------------|-------------------------------------------------------------------------------------------------------------------------------------------------------------------------------|-----------------------------------------------------------------------------------------------------------------------------|-----------------------------------------------------------------------------------------------------------------------------------|-----|
|          |                                | Abundance up                                                                                                                                                                  | Abundance down                                                                                                              |                                                                                                                                   |     |
| Glucose  | Mice/<br>In vivo               | <b>Genus:</b><br><i>Enterobacteria</i>                                                                                                                                        | <b>Genus:</b><br><i>Lactobacillus</i>                                                                                       | <b>Fecal:</b> acetate↑, aspartate↓,<br>formate↑, methanol↑, propionate↑,<br>pyruvate↑                                             | [1] |
|          | Mice/<br>In vivo <sup>b)</sup> | <b>Phylum:</b> <i>Firmicutes</i> ,<br><i>Verrucomicrobia</i> , <i>Proteobacteria</i>                                                                                          | <b>Phylum:</b><br><i>Deferribacteres</i> , <i>Bacteroidetes</i>                                                             | <b>Serum:</b> total cholesterol↑,<br>low-density lipoprotein (LDL)-<br>cholesterol↑, endotoxin↑                                   | [2] |
| Fructose | Mice/<br>In vivo               | <b>Phylum:</b> <i>Firmicutes</i> , <i>Verrucomicrobia</i> ,<br><i>Proteobacteria</i> , <i>Deferribacteres</i><br><b>Family:</b> <i>Lachnospiraceae</i> <i>Ruminococcaceae</i> | <b>Phylum:</b> <i>Bacteroidetes</i><br><b>Family:</b> <i>Deferribacteraceae</i> ,<br><i>Helicobacteraceae</i>               | <b>Fecal:</b> total SCFAs↓, Acetate↓,<br>propionate↓, butyrate↓<br><b>Serum:</b> endotoxin↑                                       | [3] |
|          | Mice/<br>In vivo               | <b>Genus:</b><br><i>Enterobacteria</i>                                                                                                                                        | <b>Genus:</b><br><i>Lactobacillus</i>                                                                                       | <b>Fecal:</b> acetate↑, formate↑,<br>aspartate↓, butyrate↓, xylose↑,<br>pyruvate↑, glutamate↓, methanol↑,<br>succinate↑, taurine↑ | [1] |
| Sucrose  | Rats/<br>In vivo               | <b>Phylum:</b> <i>Bacteroidetes</i><br><b>Family:</b> <i>Bacteroidaceae</i> ,<br><i>Erysipelotricgaceae</i> , <i>Turicibacteraceae</i>                                        | <b>Phylum:</b> <i>Firmicutes</i><br><b>Family:</b> <i>Ruminococcaceae</i> , <i>Clostridiales</i><br><i>Lactobacillaceae</i> | —                                                                                                                                 | [4] |
|          | Mice/<br>In vivo               | <b>Phylum:</b> <i>Firmicutes</i> , <i>Proteobacteria</i><br><b>Genus:</b> <i>Alistipes</i> , <i>Bacteroides</i>                                                               | <b>Phylum:</b> <i>Bacteroidetes</i><br><b>Genus:</b> <i>Lactobacillus</i> , <i>Alloprevotella</i> ,<br><i>Akkermansia</i>   | —                                                                                                                                 | [5] |
|          | Mice/<br>In vivo               | <b>Order:</b> <i>Clostridiales</i> , <i>Erysipelotrichales</i><br><i>Lactobacillales</i>                                                                                      | <b>Order:</b> <i>Bacteroidales</i><br><b>Genus:</b> <i>Alistipes</i> , <i>Ruminococcus</i> ,                                | —                                                                                                                                 | [6] |

|                                 |                  |                                                                                                                                                                                                                                                                                                      |                                                                                                                                                                    |                                                  |     |
|---------------------------------|------------------|------------------------------------------------------------------------------------------------------------------------------------------------------------------------------------------------------------------------------------------------------------------------------------------------------|--------------------------------------------------------------------------------------------------------------------------------------------------------------------|--------------------------------------------------|-----|
|                                 |                  |                                                                                                                                                                                                                                                                                                      | <i>Butyricicoccus</i>                                                                                                                                              |                                                  |     |
|                                 | Mice/<br>In vivo | <b>Phylum:</b> <i>Verrucomicrobia</i><br><b>Family:</b> <i>Verrucomicrobiaceae</i><br><i>Porphyromonadaceae</i>                                                                                                                                                                                      | <b>Phylum:</b> <i>Firmicutes, Tenericutes</i><br><i>Proteobacteria</i><br><b>Family:</b> <i>Prevotellaceae</i><br><i>Lachnospiraceae, Anaeroplasmataceae</i>       | <b>Fecal:</b> total SCFA↓<br>acetate↓, butyrate↓ | [7] |
| Sucrose<br>mimics <sup>c)</sup> | Rats/<br>In vivo | <b>Phylum:</b> <i>Firmicutes, Proteobacteria</i><br><b>Genus:</b> <i>Sutterella Parabacteroides,</i><br><i>Bacteroides, Lactobacillus, Oscillosoira</i>                                                                                                                                              | <b>Phylum:</b> <i>Verrucomicrobia, Bacteroidetes</i><br><b>Genus:</b> <i>Prevotella, Akkernansia,</i><br><i>Paraprevotella, Mucisoirillum</i>                      | —                                                | [8] |
|                                 | Rats/<br>In vivo | <b>Family:</b> <i>Rikenellaceae, Bacteroidaceae</i><br><i>Enterobacteriaceae, Bifidobacteriaceae</i><br><i>Clostridiaceae. I, Lactobacillaceae</i><br><b>Genus:</b> <i>Bacteroides, Clostridium sensu</i><br><i>stricto, Alistipes, Lactobacillus,</i><br><i>Parasutterella, Bifidobacteriaceae,</i> | <b>Family:</b><br><i>Prevotellaceae, Ruminococcaceae</i><br><i>Lachnospiraceae</i><br><b>Genus:</b><br><i>Prevotella,</i><br><i>Lachnospiraceae incertae sedis</i> | —                                                | [9] |

**Notes:**

- a) This column only lists the level of discussion highlighted in the references.
  - b) In this study, both high glucose/fructose diets were fed, both of which caused the same trend of change compared to normal diet.
  - c) In some references, glucose and fructose are mixed in certain proportions, and such "mixed sugars" are classified as "sucrose mimics" in this table.
- : Not tested; ↑: increased; ↓: decreased.

**Table S2.** Effects of starch with different digestive properties intake on gut microbiota

| Type                     | Starch origin                                               | Fermentation             | Gut microbiota                                                                                                                                                  |                                                                                                                      | SCFA                               | Ref     |
|--------------------------|-------------------------------------------------------------|--------------------------|-----------------------------------------------------------------------------------------------------------------------------------------------------------------|----------------------------------------------------------------------------------------------------------------------|------------------------------------|---------|
|                          |                                                             |                          | Abundance up                                                                                                                                                    | Abundance down                                                                                                       |                                    |         |
| RDS                      | Maltodextrin                                                | Mice/<br>In vivo         | cecal bacterial loads↑<br>chronic inflammation↑<br>disease susceptibility↑<br>gut microbes dysbiosis<br>suppressed intestinal anti-microbial defense mechanisms |                                                                                                                      |                                    | [10,11] |
|                          | Pregelatinized maize starch                                 | Mice/<br>In vivo         | <b>Phylum:</b> <i>Proteobacteria, Firmicutes</i><br><b>Genus:</b> <i>Alistipes, Oscillibacter, Ruminiclostridium-9</i>                                          | <b>Phylum:</b> <i>Bacteroidetes</i><br><b>Genus:</b> <i>bacteroides, Streptococcus</i>                               | isovalerate↓<br>valerate↓          | [12]    |
| SDS                      | Starch yields modified with 1,4-α-glucan branching enzyme   | Mice/<br>In vivo         | <b>Phylum:</b> <i>Verrucomicrobia</i><br><b>Genus:</b> <i>Lactobacillus, Lachnodpiraceae, Akkermamsia, Mucispirillum, Bifidobacterium</i>                       | <b>Phylum:</b> <i>Proteobacteria</i><br><b>Genus:</b> <i>Enterococcus, Alistipes, Odoribacter, Ruminiclostridium</i> | acetate↑<br>butyrate↑<br>valerate↑ | [12]    |
|                          | Starch-entrapped microspheres                               | Mice/<br>In vivo         | <b>Phylum:</b> <i>Firmicutes</i>                                                                                                                                | <b>Phylum:</b> <i>Bacteroidetes</i>                                                                                  | total SCFAs↑<br>acetate↓ butyrate↓ | [13]    |
|                          |                                                             |                          | (compared with RSII, raw potato starch)                                                                                                                         |                                                                                                                      |                                    |         |
| RMD<br><small>a)</small> | Cassava starch modified with α-amylase and branching enzyme | Human Feces/<br>In vitro | <b>Genus:</b> <i>Bifidobacteria, Lactobacillus</i>                                                                                                              | <b>Genus:</b> <i>Clostridia, Bacteroids</i>                                                                          | Acetic↑<br>Butyric↑                | [14]    |
|                          | (compared with glucose)                                     |                          |                                                                                                                                                                 |                                                                                                                      |                                    |         |
|                          | Resistant maltodextrin                                      | Mice/<br>In vivo         | <b>Phylum:</b> <i>Firmicutes, Proteobacteria, Actinobacteria</i>                                                                                                | <b>Phylum:</b> <i>Bacteroidetes</i><br><b>Genus:</b> <i>Bacteroides,</i>                                             | —                                  | [15]    |

|      |                                                       |                                      |                                                                                                                                        |                                                                                                                         |                                                                    |      |
|------|-------------------------------------------------------|--------------------------------------|----------------------------------------------------------------------------------------------------------------------------------------|-------------------------------------------------------------------------------------------------------------------------|--------------------------------------------------------------------|------|
|      |                                                       |                                      | <b>Genus:</b> <i>Lactobacillus, Bifidobacterium</i>                                                                                    | <i>Oscillibacter, Alistipes, Prevotella, Prevotellaceae Ruminococcaceae, Ruminococcus</i>                               |                                                                    |      |
| RSI  | Isolated intact cotyledon cells from pinto bean seeds | Human Feces/<br>In vitro             | <b>Phylum:</b> <i>Firmicutes</i><br><b>Family:</b> <i>Lachnospiraceae, Ruminococcaceae,</i><br><b>Genus:</b> <i>Clostridiales</i>      | <b>Phylum:</b> <i>Bacteroidetes</i><br><b>Family:</b> <i>Faecalibacterium</i><br><b>Genus:</b> <i>Megamonas</i>         | total SCFAs↓<br>acetate↓<br>pyruvate↓<br>butyrate↓                 | [16] |
|      | Intact cotyledon cells isolated from red kidney beans | human intestinal microbial ecosystem | <b>Phylum:</b> <i>Actinobacteria</i><br><b>Family:</b> <i>Coriobacteriaceae, Bifidobacteriaceae</i>                                    | <b>Phylum:</b> <i>Firmicutes, Bacteroidetes</i><br><b>Family:</b> <i>Bacteroidaceae, Selenomonadaceae</i>               | butyrate↑                                                          | [17] |
|      |                                                       |                                      | (compared with microbiota taken before the application of bean treatment)                                                              |                                                                                                                         |                                                                    |      |
| RSII | High-amylose maize starch                             | Mice/<br>In vivo                     | <b>Phylum:</b> <i>Verrucomicrobia, Bacteroidetes, Actinobacteria</i><br><b>Genus:</b> <i>Bifidobacterium, Akkermansia, Allobaculum</i> | <b>Phylum:</b> <i>Firmicutes</i><br><b>Genus:</b> <i>Butyrivibrio, Turicibacter</i>                                     | —                                                                  | [18] |
|      | Highly resistant starch rice                          | Feces/<br>In vitro                   | <b>Phylum:</b> <i>Bacteroidetes</i><br><b>Genus:</b> <i>Prevotellacea Faecalibacterium</i>                                             | <b>Phylum:</b> <i>Firmicutes, Proteobacteria</i><br><b>Genus:</b> <i>Escherichia, Megamonas</i>                         | Acetate↑<br>propionate↑<br>butyrate↑<br>isobutyric↓<br>isovaleric↓ | [19] |
|      | High amylose maize starch                             | Human/<br>In vivo                    | <b>Phylum:</b> <i>Bacteroidetes, Actinobacteria</i><br><b>Family:</b> <i>Ruminococcaceae, Porphyromonadaceae</i>                       | <b>Phylum:</b> <i>Firmicutes</i><br><b>Family:</b> <i>Erysipelotrichaceae</i><br><b>Genus:</b> <i>Faecalibacterium,</i> | —                                                                  | [20] |

|       |                                                      |                          |                                                                                                                                                           |                                                                                                                                                                 |                                                                                    |                                    |
|-------|------------------------------------------------------|--------------------------|-----------------------------------------------------------------------------------------------------------------------------------------------------------|-----------------------------------------------------------------------------------------------------------------------------------------------------------------|------------------------------------------------------------------------------------|------------------------------------|
|       |                                                      |                          | <b>Genus:</b> <i>Parabacteroides</i> , <i>Bifidobacterium</i>                                                                                             | <i>Dorea</i>                                                                                                                                                    |                                                                                    |                                    |
|       | Buckwheat-resistant starch                           | Mice/<br>In vivo         | <b>Phylum:</b> <i>Bacteroidetes</i><br><b>Genus:</b> <i>Bacteroides</i> , <i>Ruminiclostridium</i> , <i>Blautia</i>                                       | <b>Phylum:</b> <i>Firmicutes</i> , <i>Proteobacteria</i><br><b>Genus:</b> <i>Turicibacter</i> , <i>Erysipelatoclostridium</i> , <i>Escherichia-Shigella</i>     | Propionate↑<br>Butyrate↑                                                           | [21]                               |
| RSIII | Lotus seed resistant starch                          | Mice/<br>In vivo         | <b>Family:</b> <i>Lachnospiraceae</i> , <i>Clostridium</i> , <i>Ruminococcaceae</i><br><b>Genus:</b> <i>Lactobacillus</i> , <i>Bifidobacterium</i>        | <b>Family:</b> <i>Rikenellaceae</i> , <i>Porphyromonadaceae</i>                                                                                                 | Formic acid↑<br>Acetic acid↑<br>Propionic acid↓<br>Butyrate↑                       | [22]                               |
|       | Buckwheat-resistant starch                           | Mice/<br>In vivo         | <b>Genus:</b> <i>Lactobacillus</i> , <i>Bifidobacterium</i> , <i>Enterococcus</i>                                                                         | <b>Genus:</b> <i>Escherichia Coli</i>                                                                                                                           | Acetic acid↑<br>Butyrate↑<br>Propionic acid↑                                       | [23]                               |
|       | Retrograded tapioca starch                           | Young pigs/<br>In vivo   | <b>Family:</b> <i>Strptococcaceae</i> , <i>Bacteroidales</i><br><b>Family:</b> <i>Ruminococcaceae</i>                                                     | <b>Family:</b> <i>Lachnospiraceae</i>                                                                                                                           | —                                                                                  | [24]                               |
| RSIV  | Chemically modified phosphorylated cross-linked RSIV | Human/<br>In vivo        | <b>Phylum:</b> <i>Actinobacteria</i> , <i>Bacteroidetes</i><br><b>Genus:</b> <i>Veillonellaceae</i> , <i>Lachnospiraceae</i> , <i>Erysipelotrichaceae</i> | <b>Phylum:</b> <i>Firmicutes</i><br><b>Family:</b> <i>Ruminococcaceae</i>                                                                                       | —                                                                                  | [20]                               |
|       |                                                      | Human Feces/<br>In vitro | <b>Genus:</b> <i>Clostridiales</i> , <i>Bacteroides</i> <i>Ruminococcus</i>                                                                               | <b>Genus:</b> <i>Blautia</i> , <i>Roseburia</i> , <i>Faecalibacterium</i>                                                                                       | total SCFAs↓<br>acetate↓<br>propionic↓ butyrate↓                                   | [25]                               |
|       |                                                      |                          | (compared with high-amylose maize starch, which is the raw material of RSIV)                                                                              |                                                                                                                                                                 |                                                                                    |                                    |
|       |                                                      |                          | Human/<br>In vivo                                                                                                                                         | <b>Species:</b> <i>Ruminococcus lactaris</i> , <i>Bacteroides acidifaciens</i> , <i>Blautia glucerasea</i> , <i>Christensenella minuta</i> , <i>Eubacterium</i> | <b>Species:</b> <i>Enterococcus casseliflavus</i> , <i>Streptococcus cristatus</i> | butyric↑<br>propionic↑<br>valeric↑ |

|     |                                                                  |                          |                                                                                                                                                                                                      |                                                                                                                                                                                                                                            |                                                                |      |
|-----|------------------------------------------------------------------|--------------------------|------------------------------------------------------------------------------------------------------------------------------------------------------------------------------------------------------|--------------------------------------------------------------------------------------------------------------------------------------------------------------------------------------------------------------------------------------------|----------------------------------------------------------------|------|
|     |                                                                  |                          | <i>oxidoreducens, Parabacteroides distasonis</i>                                                                                                                                                     |                                                                                                                                                                                                                                            | isovaleric↓                                                    |      |
| RSV | Debranched high-amylose starch and palmitic acid                 | Human Feces/<br>In vitro | <b>Phylum:</b><br><i>Actinobacteria, Firmicutes</i><br><b>Genus:</b> <i>Blautia, Anaerostipes, Holdemanella, Bifidobacterium, Streptococcus, Collinsella, Dialister, Megamonas, Faecalibacterium</i> | <b>Phylum:</b> <i>Proteobacteria, Bacteroidetes</i><br><b>Genus:</b> <i>Parasutterella, Alistipes, Barnesiella, Clostridiales, Bilophila, Parabacteroides, Sutterella, Dorea, Lachnoclostridium, Flavonifractor, Phascolarctobacterium</i> | acetic acid↑<br>butyric acid↑<br>lactic acid↑<br>valeric acid↓ | [27] |
|     |                                                                  |                          | (compared with high-amylose maize starch, which is the raw material of RSII)                                                                                                                         |                                                                                                                                                                                                                                            |                                                                |      |
|     | High-amylose maize starches complexed with saturated fatty acids | Human Feces/<br>In vitro | <b>Phylum:</b> <i>Bacterioidetes</i><br><b>Genus:</b> <i>Prevotella, Megamonas, Bacteroides</i>                                                                                                      | <b>Phylum:</b> <i>Firmicutes</i><br><b>Genus:</b> <i>Roseburia, Lachnospiraceae, Ruminococcus</i>                                                                                                                                          | total SCFAs↑<br>acetate↑<br>butyrate↑<br>propionate↑           | [28] |
|     |                                                                  |                          | (compared with high-amylose maize starch, which is the raw material of RSII)                                                                                                                         |                                                                                                                                                                                                                                            |                                                                |      |

**Notes:**

a) RMD: Resistant maltodextrin

Unless otherwise noted, any upward or downward adjustments that appear in the table are compared to the normal diet or normal corn starch.

—: Not tested; ↑: increased; ↓: decreased.

## References

1. Silva, J.; Marta, M.; Martins, F.O.; Celia, N.; Teresa, G.; Tatiana, C.; Joana, P.; Daniela, D.; Barros, A.S.; Jones, J.G. Intestinal microbial and metabolic profiling of mice fed with high-glucose and high-fructose diets. *Journal of Proteome Research* **2018**, *29*, 1703079, doi:10.1021/acs.jproteome.8b00354.
2. Do, M.H.; Lee, E.; Oh, M.-J.; Kim, Y.; Park, H.-Y. High-glucose or-fructose diet cause changes of the gut microbiota and metabolic disorders in mice without body weight change. *Nutrients* **2018**, *10*, 761, doi:10.3390/nu10060761.
3. Li, J.-M.; Yu, R.; Zhang, L.-P.; Wen, S.-Y.; Wang, S.-J.; Zhang, X.-Y.; Xu, Q.; Kong, L.-D. Dietary fructose-induced gut dysbiosis promotes mouse hippocampal neuroinflammation: a benefit of short-chain fatty acids. *Microbiome* **2019**, *7*, 1-14, doi:10.1186/s40168-019-0713-7.
4. Sun, S.; Araki, Y.; Hanzawa, F.; Umeki, M.; Oda, H. High sucrose diet-induced dysbiosis of gut microbiota promotes fatty liver and hyperlipidemia in rats. *The Journal of Nutritional Biochemistry* **2021**, *93*, 108621, doi:10.1016/j.jnutbio.2021.108621.
5. Cheng, K.; Gao, R.; Yan, X.; Huang, L.; Qin, H. Probiotics improve gut microbiota dysbiosis in obese mice fed a high-fat or high-sucrose diet. *Nutrition* **2018**, *60*, doi:10.1016/j.nut.2018.10.002.
6. Magnusson, K.R.; Hauck, L.; Jeffrey, B.M.; Elias, V.; Humphrey, A.; Nath, R.; Perrone, A.; Bermudez, L.E. Relationships between diet-related changes in the gut microbiome and cognitive flexibility. *Neuroscience* **2015**, *300*, 128-140, doi:10.1016/j.neuroscience.2015.05.016.
7. Laffin, M.; Fedorak, R.; Zalasky, A.; Park, H.; Madsen, K.L. A high-sugar diet rapidly enhances susceptibility to colitis via depletion of luminal short-chain fatty acids in mice. *Scientific Reports* **2019**, *9*, 12294, doi:10.1038/s41598-019-48749-2.
8. Noble, E.E.; Olson, C.A.; Davis, E.; Tsan, L.; Chen, Y.-W.; Schade, R.; Liu, C.; Suarez, A.; Jones, R.B.; de La Serre, C. Gut microbial taxa elevated by dietary sugar disrupt memory function. *Translational psychiatry* **2021**, *11*, 1-16, doi:10.1038/s41398-021-01309-7.
9. Noble, E.E.; Hsu, T.M.; Jones, R.B.; Fodor, A.A.; Kanoski, S.E. Early-Life Sugar Consumption Affects the Rat Microbiome Independently of Obesity. *Journal of Nutrition* **2017**, *147*, 20-28, doi:10.3945/jn.116.238816.
10. Nickerson, K.P.; Homer, C.R.; Kessler, S.P.; Dixon, L.J.; Kabi, A.; Gordon, I.O.; Johnson, E.E.; de la Motte, C.A.; McDonald, C. The dietary polysaccharide maltodextrin promotes *Salmonella* survival and mucosal colonization in mice. *PLoS One* **2014**, *9*, e101789, doi:10.1371/journal.pone.0101789.
11. Nickerson, K.P.; McDonald, C. Crohn's Disease-Associated Adherent-Invasive *Escherichia coli* Adhesion Is Enhanced by Exposure to the

Ubiquitous Dietary Polysaccharide Maltodextrin. *PloS One* **2012**, 7, e52132, doi:10.1371/journal.pone.0052132.

12. Kong, H. Novel Short-Clustered Maltodextrin as a Dietary Starch Substitute Attenuates Metabolic Dysregulation and Restructures Gut Microbiota in db/db Mice. *Journal of Agricultural and Food Chemistry* **2020**, 68, 44, doi:10.1021/acs.jafc.0c05798.
13. Kaur, A.; Chen, T.; Green, S.J.; Mutlu, E.; Martin, B.; Rumpagaporn, P.; Patterson, J.A.; Keshavarzian, A.; Hamaker, B.R. Physical Inaccessibility of a Resistant Starch Shifts Mouse Gut Microbiota to Butyrogenic Firmicutes. *Molecular Nutrition & Food Research* **2019**, 63, 1801012, doi:10.1002/mnfr.201801012.
14. Sorndec H , W.; Rodtong, S.; Blennow, A.; Tongta, S. Impact of Resistant Maltodextrins and Resistant Starch on Human Gut Microbiota and Organic Acids Production. *Starch - Starke* **2019**, 71, 1800231, doi:10.1002/star.201800231.
15. He, B.; Nohara, K.; Ajami, N.J.; Michalek, R.D.; Tian, X.; Wong, M.; Losee-Olson, S.H.; Petrosino, J.F.; Yoo, S.-H.; Shimomura, K. Transmissible microbial and metabolomic remodeling by soluble dietary fiber improves metabolic homeostasis. *Scientific reports* **2015**, 5, 1-12, doi:10.1038/srep10604.
16. Guan, N.; He, X.; Wang, S.; Liu, F.; Huang, Q.; Fu, X.; Chen, T.; Zhang, B. Cell wall integrity of pulse modulates the in vitro fecal fermentation rate and microbiota composition. *Journal of agricultural and food chemistry* **2020**, 68, 1091-1100, doi:10.1021/acs.jafc.9b06094.
17. Rovalino-Córdova, A.M.; Fogliano, V.; Capuano, E. Effect of bean structure on microbiota utilization of plant nutrients: An in-vitro study using the simulator of the human intestinal microbial ecosystem (SHIME®). *Journal of Functional Foods* **2020**, 73, 104087, doi:10.1016/j.jff.2020.104087.
18. Sybille, T.; June, Z.; Michael, K.; Roy, M.; Maria L, M. The intestinal microbiota in aged mice is modulated by dietary resistant starch and correlated with improvements in host responses. *FEMS microbiology ecology* **2013**, 83, 299-309, doi:10.1111/j.1574-6941.2012.01475.x.
19. Li, Z.T.; Hu, G.A.; Zhu, L.; Zhao, Z.C.; Zhan, X.B. In vitro digestion and fecal fermentation of highly resistant starch rice and its effect on the gut microbiota. *Food Chemistry* **2021**, 361, 130095, doi:10.1016/j.foodchem.2021.130095.
20. Inés, M.; Jaehyoung, K.; Duffy, P.R.; Schlegel, V.L.; Jens, W.; Heimesaat, M.M. Resistant Starches Types 2 and 4 Have Differential Effects on the Composition of the Fecal Microbiota in Human Subjects. *Plos One* **2010**, 5, e15046, doi:/10.1371/journal.pone.0015046.
21. Zhou, Y.; Wei, Y.; Yan, B.; Zhao, S.; Zhou, X. Regulation of tartary buckwheat - resistant starch on intestinal microflora in mice fed with high - fat diet. *Food science & nutrition* **2020**, 8, 3243-3251, doi:10.1002/fsn3.1601.



22. Zeng, H.; Huang, C.; Lin, S.; Zheng, M.; Chen, C.; Zheng, B.; Zhang, Y. Lotus seed resistant starch regulates gut microbiota and increases short-chain fatty acids production and mineral absorption in mice. *Journal of agricultural and food chemistry* **2017**, *65*, 9217-9225, doi:10.1021/acs.jafc.7b02860.
23. Zhou, Y.; Zhao, S.; Jiang, Y.; Wei, Y.; Zhou, X. Regulatory function of buckwheat - resistant starch supplementation on lipid profile and gut microbiota in mice fed with a high - fat diet. *Journal of food science* **2019**, *84*, 2674-2681, doi:10.1111/1750-3841.14747.
24. Umu, Ö.C.; Frank, J.A.; Fangel, J.U.; Oostindjer, M.; da Silva, C.S.; Bolhuis, E.J.; Bosch, G.; Willats, W.G.; Pope, P.B.; Diep, D.B. Resistant starch diet induces change in the swine microbiome and a predominance of beneficial bacterial populations. *Microbiome* **2015**, *3*, 1-15, doi:10.1186/s40168-015-0078-5.
25. Wang, S.; Zhang, B.; Chen, T.; Li, C.; Huang, Q. Chemical Cross-Linking Controls in Vitro Fecal Fermentation Rate of High-Amylose Maize Starches and Regulates Gut Microbiota Composition. *Journal of Agricultural and Food Chemistry* **2019**, *67*, 13728-13736, doi:10.1021/acs.jafc.9b04410.
26. Upadhyaya, B.; McCormack, L.; Fardin-Kia, A.R.; Juenemann, R.; Dey, M. Impact of dietary resistant starch type 4 on human gut microbiota and immunometabolic functions. *Scientific Reports* **2016**, *6*, 28797, doi:10.1038/srep28797.
27. Qin, R.; Wang, J.; Chao, C.; Yu, J.; Wang, S. RS5 Produced More Butyric Acid through Regulating the Microbial Community of Human Gut Microbiota. *Journal of Agricultural and Food Chemistry* **2021**, *69*, 3209-3218, doi:10.1021/acs.jafc.0c08187.
28. Zhou, Q.; Fu, X.; Dhital, S.; Zhai, H.; Zhang, B. In vitro fecal fermentation outcomes of starch-lipid complexes depend on starch assembles more than lipid type. *Food Hydrocolloids* **2021**, 10.1016/j.foodhyd.2021.106941, 106941, doi:10.1016/j.foodhyd.2021.106941.
